# Supplementary material for: Exercise training reduces fatty acid availability and improves the insulin sensitivity of glucose metabolism
Source: Springer Nature journal article supplement (doi:10.1007/s00125-006-0498-7), 2006-12-05
Supplement: MOESM1 [file 125_2006_498_MOESM1_ESM.doc]

**Electronic supplementary material**

**Subjects and methods**

*Training protocol* After completion of the initial (0 weeks) metabolic study and body composition measurements, subjects who were allocated to the exercise group started the exercise programme. Subjects exercised at 60 to 85% of maximal aerobic capacity (*V*O2max) for a minimum of 20 min at least three times per week for 6 weeks. For one exercise session per week they were supervised by the exercise physiologist to ensure adherence to the exercise programme and to monitor exercise intensity levels. Subjects were allowed to choose the mode of exercise that suited their lifestyle and were set realistic goals. The control group was asked to continue with their normal activity for the duration of the 6-week period. Both groups were asked not to change their dietary habits during the study.

*Maximal aerobic capacity (*V*O2max) V*O2max was measured using a step-wise maximal exercise test on an electronically braked bicycle ergonometer (Lode; Excaliber Sport, Groningen, the Netherlands) using a computerised open-loop gas analyser system (Medical Graphics, St Paul, MN, USA) with ECG monitoring to ensure patients had no latent ischaemic heart disease. The exercise test was terminated when heart rate and or *V*O2 reached a plateau or when patients reached exhaustion [1].

*1H-magnetic resonance spectroscopy ( 1H-MRS)* In brief, spectra were acquired using a 1.5 T Eclipse multinuclear system (Philips Medical Systems, Cleveland, OH, USA). IMCL spectra were obtained from the tibialis muscle group, which is predominantly of glycolytic fibres, in the left lower leg using a quadrature birdcage coil. Transverse T1-weighted MR images (TR 600 ms, TE 16 ms) were acquired to determine the placement of the 1H-MRS voxel and spectra were obtained using a point resolved spectroscopy (PRESS) sequence with a 5 T Eclipse multinuclear system (Philips Medical Systems) (TR 1500 ms, TE 135 ms, voxel: 8 cm3), using the creatine signal as an internal standard (256 averages were acquired). IHCL spectra were acquired from the right lobe of the liver using a PRESS sequence (TR 1500 ms, TE 135 ms), using the water signal as an internal reference, with 128 signal averages. Transverse images of the liver were used to ensure accurate positioning of the 8 cm3 voxel in the liver, avoiding blood vessels, the gallbladder and fatty tissue. All spectra were analysed in the time domain using the AMARES algorithm included in the MRUI software package [2]. The IMCL and IHCL data are expressed as ratios and therefore have no units of measurement. IMCL is given as a ratio to the muscle creatine signal. IHCL values are given as a ratio to liver water content. The correlation of variation for repeated measurements (inter-examination variability) has been previously reported by our group as 13.6 ± 3.5%.

*Computer tomography (CT)* CT (Tomoscan AV, Philips, the Netherlands) was used to measure cross-sectional abdominal visceral adipose tissue areas at the L4/5 region and the cross-sectional muscle and adipose tissue areas of both legs at the mid-thigh region. The abdominal fat mass and its distribution in subcutaneous and intra-abdominal fat were estimated by area measurements on CT slices. In three subjects subcutaneous abdominal fat could not be measured due to insufficient data collection. Tissue with attenuation values in the interval of 30 to 190 Hounsfield units was considered to be fat [3].

*Analytical methods* All isotopic enrichments were measured by GC-MS on a HP 5971A MSD (Agilent Technologies, Wokingham, Berks, UK). The *tris*-trimethylsilyl derivative of glycerol was analysed using electron impact ionisation with selected ion monitoring of the ions at *m*/*z* 205 and 208. Glycerol concentration was determined using a colorimetric assay (Randox Laboratories, Crumlin, Co. Antrim, UK; interassay CV 3.6%) using a Cobas Fara II autoanalyzer (Roche, Welwyn Garden City, UK). The isotopic enrichment and concentration of palmitic acid were measured after addition of the internal standard (heptadecanoic acid). Palmitic acid and the internal standard were extracted and methylated with iodomethane, the fatty acid methyl esters were purified by solid phase extraction chromatography and analysed by selected ion monitoring of the ions at *m*/*z* 270, 271 and 284 [4, 5]. The isotopic enrichment of glucose was determined using the penta-*O*-trimethylsilyl-d-glucose-*o*-methoxime derivative analysed by selected ion monitoring of the ions at m/z 319 and 321 [6]. Glucose concentration in the plasma samples was determined by a glucose oxidase method using a glucose analyser (Clandon Scientific; Yellow Springs Instruments, Yellow Springs, OH, USA).

References

1. Borg G, Linderholm H (1967) Perceived exertion and pulse rate during graded exercise in various age groups. Acta Med Scand (Suppl) 472: 194–206

2. Naressi A, Couturier C, Devos JM et al (2001) Java-based graphical user interface for the MRUI quantitation package. MAGMA 12: 141–152

3. Rendell M, Hulthen UL, Tornquist C, Groop L, Mattiasson I (2001) Relationship between abdominal fat compartments and glucose and lipid metabolism in early postmenopausal women. J Clin Endocrinol Metab 86: 744–749

4. Elia M, Khan K, Jennings G (1999) Effect of mixed meal ingestion on fuel utilization in the whole body and in superficial and deep forearm tissues. Br J Nutr 81: 373–381

5. Patterson BW, Zhao G, Elias N, Hachey DL, Klein S (1999) Validation of a new procedure to determine plasma fatty acid concentration and isotopic enrichment. J Lipid Res 40: 2118–2124

6. Shojaee-Moradie F, Jackson NC, Jones RH, Mallet AI, Hovorka R, Umpleby AM (1996) Quantitative measurement of 3-O-methyl-D-glucose by gas chromatography-mass spectrometry as a measure of glucose transport in vivo. J Mass Spectrom 31: 961–966
